# Supplementary material for: Interactive effects between the invasive weed Stellera chamaejasme and grass: can arbuscular mycorrhizal fungi and fungal pathogens coregulate interspecific relationships?
Source: PubMed Central journal article supplement (PMC10498474; doi:10.3389/fmicb.2023.1236891), 2023-08-30
Supplement: Data_Sheet_1.pdf [file Data_Sheet_1.pdf]

*Supplementary Material*

**Interactive effects between an invasive weed *Stellera chamaejasme* and a grass: Can arbuscular mycorrhizal fungi and fungal pathogens co-regulate interspecific relationships?**

**Ruohui Zhang<sup>1</sup>, Shanmin Qu<sup>2</sup>, Bin Zhang<sup>1</sup>, Ying Gao<sup>1</sup>, Fu Xing<sup>1\*</sup>**

**\* Corresponding author: Fu Xing**

E-mail address: [xingf522@126.com](mailto:xingf522@126.com)

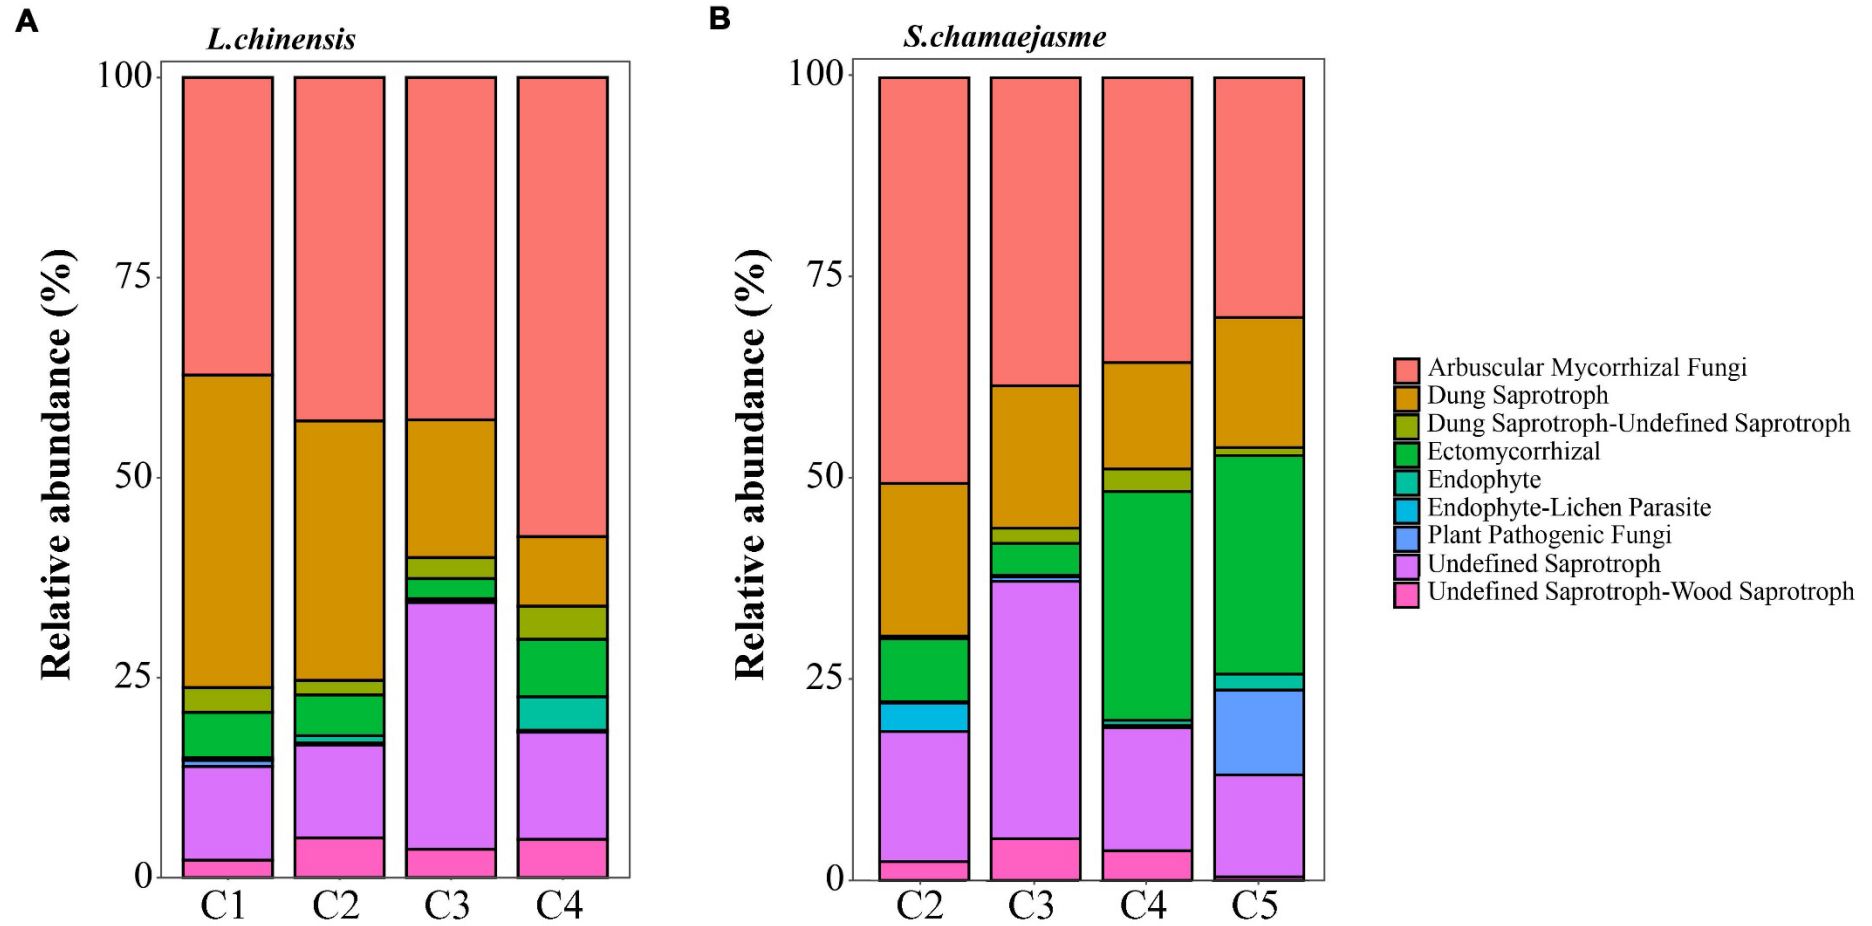

**Supplementary Figure 1** The relative abundances of the predictive fungal functional groups in the rhizosphere soil of *L. chinensis* (a) and *S. chamaejasme* (b) among the different combinations of the initial individual ratios (mean±SE). C1, C2, C3, C4, and C5 indicating the respective proportions of *L. chinensis* and *S. chamaejasme* were 12:0, 8:4, 6:6, 4:8, and 0:12, respectively.

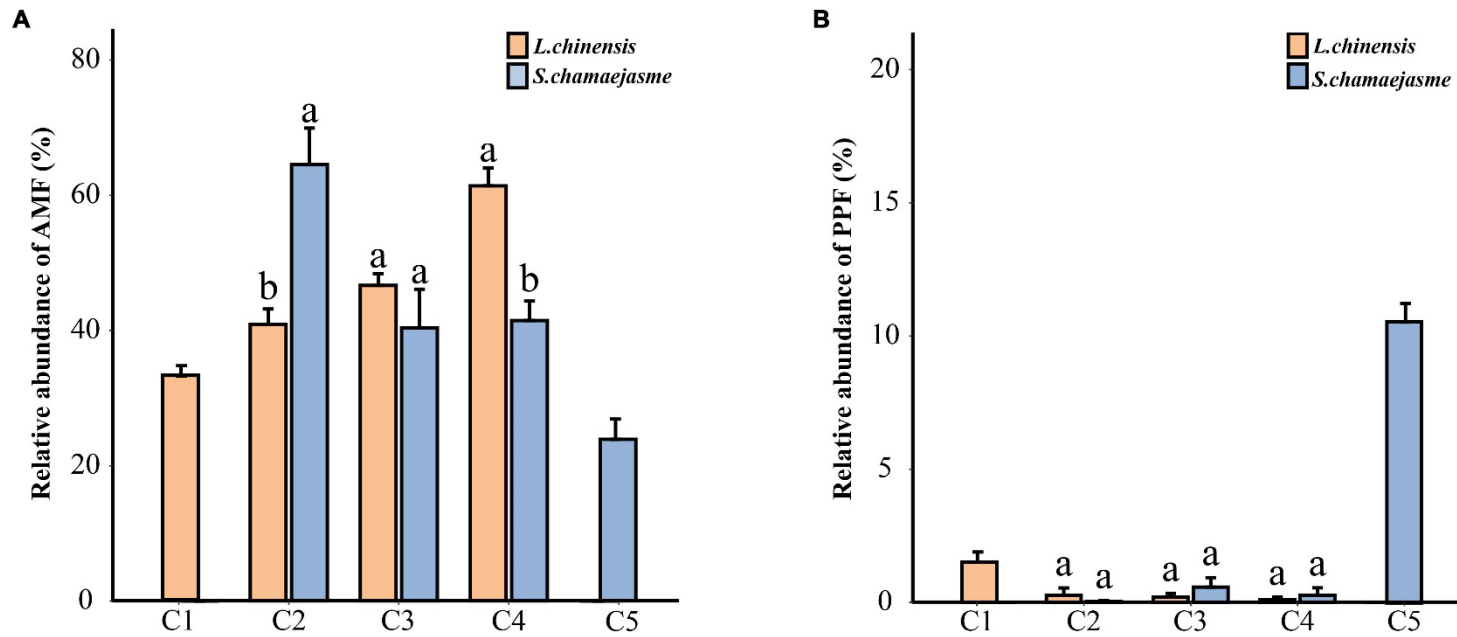

**Supplementary Figure 2** The relative abundances of the predictive arbuscular mycorrhizal fungi (AMF) (a) and plant pathogenic fungi (PPF) (b) in the rhizosphere soil of *L. chinensis* and *S. chamaejasme* among the different combinations of the initial individual ratios (mean±SE). C1, C2, C3, C4, and C5 indicating the respective proportions of *L. chinensis* and *S. chamaejasme* were 12:0, 8:4, 6:6, 4:8, and 0:12, respectively. The different lowercase letters indicate significant differences among the same combinations ( $p < 0.05$ ).

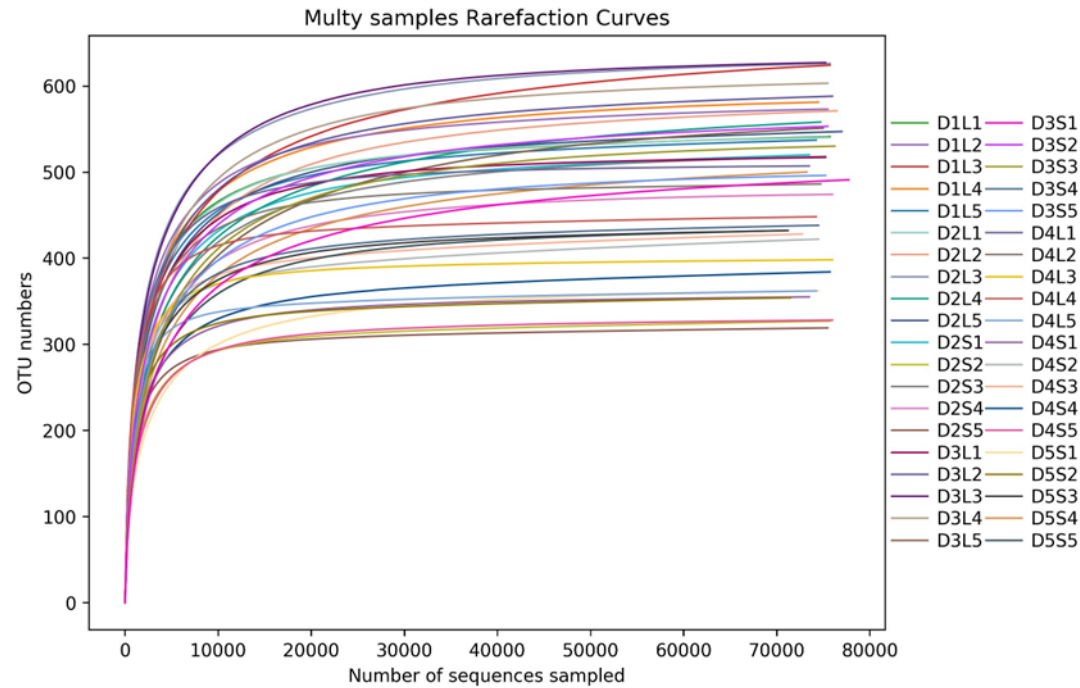

**Supplementary Figure 3** The Rarefaction Curves of each sample. Note: X-axis represents the number of sequences picked randomly, Y-axis represents the OTU number based on the clustering of these sequences, each curve stands for a sample and they are marked by different colors. D1, D2, D3, D4 and D5 indicating the respective proportions of *L. chinensis* and *S. chamaejasme* were 12:0, 8:4, 6:6, 4:8, and 0:12 respectively. L: the rhizosphere soil of *L. chinensis*; S: the rhizosphere soil of *S. chamaejasme*.

*Supplementary Material*

**Interactive effects between an invasive weed *Stellera chamaejasme* and a grass: Can arbuscular mycorrhizal fungi and fungal pathogens co-regulate interspecific relationships?**

**Ruohui Zhang<sup>1</sup>, Shanmin Qu<sup>2</sup>, Bin Zhang<sup>1</sup>, Ying Gao<sup>1</sup>, Fu Xing<sup>1\*</sup>**

**\* Corresponding author: Fu Xing**

E-mail address: [xingf522@126.com](mailto:xingf522@126.com)

**Supplementary Table 1** Initial physicochemical properties of experimental soil substrates (mean±SE). EC: Electrical conductivity; SWC: Soil water content; TC: Total carbon; TN: Total nitrogen; NO<sub>3</sub><sup>-</sup>-N: Nitrate nitrogen; NH<sub>4</sub><sup>+</sup>-N: Ammonium nitrogen; AN: Available nitrogen.

| <b>EC</b>   | <b>SWC<br/>(%)</b> | <b>pH</b> | <b>TC<br/>(g/kg)</b> | <b>TN<br/>(mg/kg)</b> | <b>NO<sub>3</sub><sup>-</sup>-N<br/>(mg/kg)</b> | <b>NH<sub>4</sub><sup>+</sup>-N<br/>(mg/kg)</b> | <b>AN<br/>(mg/kg)</b> |
|-------------|--------------------|-----------|----------------------|-----------------------|-------------------------------------------------|-------------------------------------------------|-----------------------|
| 129.13±3.20 | 2.86±0.46          | 8.11±0.20 | 4.62±0.07            | 441.83±11.00          | 1.70±0.21                                       | 0.57±0.04                                       | 22.11±0.25            |

**The sequencing process in this article is as follows:** Library construction and sequencing: after extracting the total DNA of the sample, primers were designed according to the conserved region, sequencing adaptors were added to the end of primers; The target sequences were amplified by PCR and its products were purified, quantified and homogenized to get a sequencing library; Then library QC was performed for constructing libraries, qualified libraries were sequenced on Illumina HiSeq 2500. The original image data files obtained by high-throughput sequencing (such as Illumina HiSeq and other sequencing platforms) were converted into Sequenced Reads by Base Calling analysis, the results were stored in FASTQ (referred to as fq) format file, which contains sequence information of reads and their corresponding sequencing quality information.

Data preprocessing: According to overlap relation between PE reads, merge the paired-ends sequence data obtained from Hiseq sequencing into tags of one sequence, then perform quality control and filtering for reads quality and Merge effect. There are three main steps as follows:

- 1)PE reads merge: FLASH v1.2.7 software is used to merge reads through overlap, the obtained merged sequences are Raw Tags;
- 2)Tags filtering: Use Trimmomatic v0.33 software to filter merged Raw Tags to get high quality Clean Tags;
- 3)Remove Chimera: Use UCHIME v4.2 software to identify and remove chimera sequences to get Effective Tags

After sequencing, there are 3,200,605 pairs Reads among 40 samples; 3,129,756 Clean tags after pair-end Reads alignment and filtering. For each sample, there are at least 74,290 Clean tags and 78,244 Clean tags on average. Our data belongs to diversity sequencing and does not have the concept of depth. Here, we use clean tags as our data volume display. Our sequencing data is sufficient. Based on reviewer's suggestion, we presented some sequencing results to you.

The assessment result of sequencing data of each sample is shown as below table (Supplementary Table 2)

In our sequencing results, the number of clean tags in the fourth column is very high, which indicates the rationality of our sequencing results. In addition, we also have the data of Alpha diversity index and Rarefaction Curve to answer your questions.

Second, we used Mothur (version v.1.30) software to evaluate the Alpha diversity index of samples (Supplementary Table 3). The statistics of Alpha diversity index value of each sample is shown in the following table. Our coverage age data is generally close to one, indicating that our sequencing results are reasonable.

Third, Rarefaction Curve randomly pick a certain number of sequences from sample, count the species number represented by these sequences, then use the sequences count and species number to construct the curve to verify whether the sequencing amount can reflect the species diversity in samples, the rarefaction curve can also reflect the richness of species in samples. The figure below shows the rate of new OTU (novel species) emerging under

continuous sampling (Supplementary Figure 2): as the sequences count increases within a certain range, the sharp increase of the curve presents that a large number of species were found; when the curve tends to be flat, it means that the species number won't increase significantly when the sequencing amount increases. Rarefaction curve can be used to determine whether sequencing amount of each sample is sufficient, the sharp increase of the curve means that the sequencing amount is insufficient, more sequencing data is needed; otherwise, the sequencing amount is sufficient for bioinformatics. (Wang et al., 2012)

Finally, we used Usearch software (Edgar et al., 2013) then perform taxonomic annotation for operational taxonomic unit (OTU) on the basis of UNITE taxonomic database. The count of OTU of each sample was obtained at 97% similarity level. Finally, we clustered the optimized sequences to get OTU, then get the species classification according to the sequence composition of OTU. Ecological function of fungi was assigned to each taxon (where identified) at species, genus, or family level using the FunGuild database (Nguyen et al., 2016). The specific steps and preliminary results of our microbial diversity sequencing are detailed in the supplementary material. The datasets presented in this study can be found in online repositories, and the accession number can be found below: <https://www.ncbi.nlm.nih.gov/bioproject/PRJNA1000115>.



**Supplementary Table 2** The assessment result of sequencing data of each sample. D1, D2, D3, D4 and D5 indicating the respective proportions of *L. chinensis* and *S. chamaejasme* were 12:0, 8:4, 6:6, 4:8, and 0:12 respectively. L: the rhizosphere soil of *L. chinensis*; S: the rhizosphere soil of *S. chamaejasme*. Sample ID is the name of sample; PE Reads is the paired-ends reads count obtained from sequencing; Raw Tags is the count of original sequences merged from paired-ends reads; Clean Tags is the count of optimized sequences after filtering of raw tags; Effective Tags is the count of effective sequences after filtering chimera from Clean Tags; AvgLen (bp) is the average sequence length of sample; GC(%) is the GC content of sample, i.e. the percentage of G and C bases in all bases; Q20(%) is the percentage of bases which quality value is no less than 20 in all bases; Q30(%) is the percentage of bases which quality value is no less than 30 in all bases; Effective(%) is the percentage of Effective Tags in PE Reads.

| Sample ID | PE Reads | Raw Tags | Clean Tags | Effective Tags | AvgLen(bp) | GC (%) | Q20(%) | Q30(%) | Effective (%) |
|-----------|----------|----------|------------|----------------|------------|--------|--------|--------|---------------|
| D1L1      | 79,924   | 79,251   | 79,250     | 79,166         | 244        | 47.7   | 99.76  | 99.28  | 99.05         |
| D1L2      | 80,280   | 79,652   | 79,651     | 79,390         | 249        | 47.4   | 99.75  | 99.24  | 98.89         |
| D1L3      | 80,175   | 78,987   | 78,984     | 78,831         | 241        | 47.55  | 99.77  | 99.31  | 98.32         |
| D1L4      | 79,809   | 78,048   | 78,046     | 77,805         | 247        | 46.78  | 99.75  | 99.26  | 97.49         |
| D1L5      | 79,791   | 78,366   | 78,363     | 78,040         | 243        | 47.22  | 99.75  | 99.26  | 97.81         |
| D2L1      | 79,973   | 78,865   | 78,865     | 78,654         | 251        | 46.35  | 99.74  | 99.24  | 98.35         |
| D2L2      | 79,781   | 79,178   | 79,177     | 78,943         | 254        | 45.94  | 99.71  | 99.18  | 98.95         |
| D2L3      | 80,051   | 79,301   | 79,300     | 79,212         | 245        | 47.13  | 99.74  | 99.24  | 98.95         |
| D2L4      | 80,352   | 79,478   | 79,477     | 77,549         | 236        | 46.35  | 99.79  | 99.35  | 96.51         |
| D2L5      | 80,061   | 79,363   | 79,361     | 79,249         | 243        | 46.29  | 99.74  | 99.25  | 98.99         |
| D2S1      | 79,752   | 77,881   | 77,879     | 77,460         | 251        | 47.85  | 99.73  | 99.18  | 97.13         |
| D2S2      | 79,967   | 78,146   | 78,146     | 77,890         | 253        | 48.03  | 99.72  | 99.15  | 97.4          |
| D2S3      | 80,061   | 77,813   | 77,810     | 77,551         | 257        | 49.54  | 99.7   | 99.12  | 96.86         |
| D2S4      | 79,830   | 78,332   | 78,330     | 78,156         | 252        | 48.3   | 99.72  | 99.16  | 97.9          |

---

|      |        |        |        |        |     |       |       |       |       |
|------|--------|--------|--------|--------|-----|-------|-------|-------|-------|
| D2S5 | 79,890 | 78,668 | 78,668 | 78,475 | 251 | 47.36 | 99.72 | 99.18 | 98.23 |
| D3L1 | 79,806 | 79,143 | 79,140 | 79,087 | 245 | 46.93 | 99.76 | 99.28 | 99.1  |
| D3L2 | 80,361 | 79,633 | 79,631 | 79,542 | 255 | 46.82 | 99.73 | 99.22 | 98.98 |
| D3L3 | 80,006 | 78,978 | 78,975 | 78,905 | 244 | 46.71 | 99.75 | 99.26 | 98.62 |
| D3L4 | 80,025 | 78,098 | 78,095 | 78,004 | 246 | 46.57 | 99.76 | 99.29 | 97.47 |
| D3L5 | 79,629 | 77,070 | 77,069 | 76,801 | 257 | 45.71 | 99.71 | 99.19 | 96.45 |
| D3S1 | 80,109 | 79,357 | 79,356 | 79,173 | 261 | 50.67 | 99.68 | 99.06 | 98.83 |
| D3S2 | 80,024 | 78,393 | 78,393 | 78,288 | 259 | 49.06 | 99.69 | 99.11 | 97.83 |
| D3S3 | 79,931 | 78,674 | 78,674 | 78,386 | 270 | 50.11 | 99.63 | 98.98 | 98.07 |
| D3S4 | 80,037 | 77,691 | 77,687 | 77,638 | 252 | 47.5  | 99.73 | 99.22 | 97    |
| D3S5 | 79,797 | 77,371 | 77,369 | 77,181 | 258 | 46.64 | 99.72 | 99.23 | 96.72 |
| D4L1 | 79,973 | 79,104 | 79,102 | 77,705 | 242 | 47.47 | 99.78 | 99.31 | 97.16 |
| D4L2 | 80,383 | 79,562 | 79,555 | 79,288 | 236 | 46.72 | 99.8  | 99.37 | 98.64 |
| D4L3 | 80,107 | 79,008 | 79,006 | 78,779 | 250 | 47.11 | 99.73 | 99.22 | 98.34 |
| D4L4 | 80,070 | 79,078 | 79,077 | 78,544 | 259 | 45.16 | 99.69 | 99.16 | 98.09 |
| D4L5 | 80,107 | 78,782 | 78,782 | 78,552 | 253 | 45.27 | 99.71 | 99.19 | 98.06 |
| D4S1 | 79,894 | 77,990 | 77,990 | 77,843 | 248 | 49.03 | 99.75 | 99.25 | 97.43 |
| D4S2 | 79,861 | 77,818 | 77,817 | 77,691 | 249 | 48.08 | 99.76 | 99.27 | 97.28 |
| D4S3 | 80,349 | 76,936 | 76,932 | 76,295 | 250 | 49.06 | 99.76 | 99.29 | 94.95 |
| D4S4 | 80,225 | 78,302 | 78,302 | 77,911 | 260 | 50    | 99.71 | 99.15 | 97.12 |
| D4S5 | 80,188 | 78,762 | 78,762 | 78,487 | 261 | 48.49 | 99.71 | 99.19 | 97.88 |
| D5S1 | 79,660 | 77,789 | 77,789 | 77,558 | 241 | 48.94 | 99.79 | 99.34 | 97.36 |
| D5S2 | 80,232 | 75,296 | 75,291 | 75,183 | 253 | 48.42 | 99.71 | 99.15 | 93.71 |
| D5S3 | 80,158 | 74,752 | 74,750 | 74,171 | 260 | 48.98 | 99.69 | 99.12 | 92.53 |

---

---

|      |        |        |        |        |     |       |       |       |       |
|------|--------|--------|--------|--------|-----|-------|-------|-------|-------|
| D5S4 | 79,826 | 76,628 | 76,615 | 76,506 | 246 | 48.84 | 99.75 | 99.26 | 95.84 |
| D5S5 | 80,150 | 74,293 | 74,290 | 73,973 | 250 | 49.61 | 99.74 | 99.22 | 92.29 |

---

**Supplementary Table 3** The statistics of Alpha diversity index value of each sample. OTU presents the number of OTU; Chao1, Ace, Shannon and Simpson represent each index respectively. Coverage represents the Coverage of the sample library. D1, D2, D3, D4 and D5 indicating the respective proportions of *L. chinensis* and *S. chamaejasme* were 12:0, 8:4, 6:6, 4:8, and 0:12 respectively. L: the rhizosphere soil of *L. chinensis*; S: the rhizosphere soil of *S. chamaejasme*.

| Sample ID | OTU | ACE      | Chao1    | Simpson | Shannon | Coverage |
|-----------|-----|----------|----------|---------|---------|----------|
| D1L1      | 541 | 549.1505 | 555      | 0.0194  | 4.8976  | 0.9997   |
| D1L2      | 573 | 579.3852 | 578.2308 | 0.0178  | 4.9635  | 0.9998   |
| D2S1      | 520 | 530.7851 | 547      | 0.0229  | 4.6836  | 0.9996   |
| D2S2      | 327 | 335.4497 | 353.25   | 0.0586  | 3.9831  | 0.9998   |
| D2S3      | 518 | 524.7406 | 523.2759 | 0.0346  | 4.4488  | 0.9998   |
| D2S4      | 474 | 477.2132 | 477.2353 | 0.0292  | 4.5621  | 0.9999   |
| D2S5      | 319 | 325.2768 | 337.3333 | 0.0282  | 4.4417  | 0.9999   |
| D3L1      | 517 | 520.2441 | 536.5    | 0.0169  | 4.8505  | 0.9998   |
| D3L2      | 588 | 597.3871 | 605.6471 | 0.0246  | 4.7299  | 0.9997   |
| D3L3      | 627 | 631.554  | 636.0667 | 0.0151  | 5.0572  | 0.9998   |
| D3L4      | 603 | 608.8583 | 611.55   | 0.0167  | 4.9037  | 0.9997   |
| D3L5      | 551 | 567.0813 | 568.5263 | 0.2552  | 3.207   | 0.9995   |
| D1L3      | 624 | 643.8382 | 651.3636 | 0.0286  | 4.5803  | 0.9994   |
| D3S1      | 491 | 510.6242 | 521.875  | 0.1307  | 3.4442  | 0.9995   |
| D3S2      | 553 | 563.3328 | 568.9545 | 0.0295  | 4.5361  | 0.9996   |
| D3S3      | 530 | 536.1829 | 536.1071 | 0.0866  | 3.8649  | 0.9998   |
| D3S4      | 438 | 444.6043 | 453      | 0.0359  | 4.3835  | 0.9998   |

---

|      |     |          |          |        |        |        |
|------|-----|----------|----------|--------|--------|--------|
| D3S5 | 496 | 500.987  | 501      | 0.1535 | 3.7405 | 0.9998 |
| D4L1 | 507 | 508.3853 | 509.1429 | 0.0197 | 4.9098 | 0.9999 |
| D4L2 | 486 | 489.1131 | 519      | 0.0594 | 4.4841 | 0.9998 |
| D4L3 | 398 | 400.1901 | 401      | 0.0142 | 4.967  | 0.9999 |
| D4L4 | 448 | 455.3825 | 461.2    | 0.0118 | 5.1239 | 0.9998 |
| D4L5 | 362 | 372.0506 | 375.2    | 0.0264 | 4.6946 | 0.9998 |
| D1L4 | 581 | 588.334  | 588.3077 | 0.0138 | 5.0368 | 0.9997 |
| D4S1 | 355 | 357.6292 | 362      | 0.0347 | 4.315  | 0.9999 |
| D4S2 | 422 | 470.4432 | 467.1111 | 0.051  | 4.4586 | 0.9996 |
| D4S3 | 428 | 448.3882 | 462.5    | 0.0351 | 4.4677 | 0.9997 |
| D4S4 | 384 | 395.4321 | 403      | 0.0667 | 3.9729 | 0.9997 |
| D4S5 | 328 | 330.6792 | 331      | 0.0499 | 3.9804 | 0.9999 |
| D5S1 | 362 | 365.9507 | 367.0769 | 0.0872 | 3.635  | 0.9998 |
| D5S2 | 354 | 361.9003 | 365      | 0.0281 | 4.5658 | 0.9998 |
| D5S3 | 432 | 436.4459 | 443.375  | 0.043  | 4.2846 | 0.9998 |
| D5S4 | 500 | 515.6759 | 520.5172 | 0.0375 | 4.2142 | 0.9995 |
| D5S5 | 432 | 436.968  | 441.2308 | 0.042  | 4.1325 | 0.9998 |
| D1L5 | 537 | 545.0982 | 547.5556 | 0.0181 | 4.8933 | 0.9997 |
| D2L1 | 540 | 545.3992 | 548.5714 | 0.0328 | 4.7592 | 0.9998 |
| D2L2 | 571 | 580.3687 | 585.625  | 0.1308 | 3.8359 | 0.9996 |
| D2L3 | 626 | 632.7481 | 635.5    | 0.0131 | 5.1367 | 0.9997 |
| D2L4 | 558 | 576.065  | 578.1818 | 0.0613 | 4.2726 | 0.9995 |
| D2L5 | 547 | 556.3418 | 587.625  | 0.0388 | 4.5477 | 0.9997 |

---

**Supplementary Table 4** OTU data of AMF obtained by utilizing fungal function prediction. OTU: Oxygen Tolerance Unit. AMF: arbuscular mycorrhiza fungi.

| <b>AMF</b> | <b>taxonomy</b>                                                                                                                                 |
|------------|-------------------------------------------------------------------------------------------------------------------------------------------------|
| OTU1034    | <i>k__Fungi; p__Glomeromycota; c__Glomeromycetes; o__Glomerales; f__Glomeraceae; Unclassified; Unclassified</i>                                 |
| OTU1082    | <i>k__Fungi; p__Glomeromycota; c__Glomeromycetes; o__Glomerales; f__Claroideoglomeraceae; g__Claroideoglomus; s__Claroideoglomus_drummondii</i> |
| OTU1111    | <i>k__Fungi; p__Glomeromycota; c__Glomeromycetes; o__Glomerales; f__Glomeraceae; Unclassified; Unclassified</i>                                 |
| OTU1151    | <i>k__Fungi; p__Glomeromycota; c__Glomeromycetes; o__Glomerales; f__Glomeraceae; Unclassified; Unclassified</i>                                 |
| OTU1608    | <i>k__Fungi; p__Glomeromycota; c__Glomeromycetes; o__Glomerales; f__Glomeraceae; g__Dominikia; s__Dominikia_bernensis</i>                       |
| OTU1812    | <i>k__Fungi; p__Glomeromycota; c__Glomeromycetes; o__Glomerales; f__Glomeraceae; g__Glomus; s__Glomus_indicum</i>                               |
| OTU1975    | <i>k__Fungi; p__Glomeromycota; c__Glomeromycetes; o__Glomerales; f__Glomeraceae; g__Glomus; Unclassified</i>                                    |
| OTU212     | <i>k__Fungi; p__Glomeromycota; c__Glomeromycetes; o__Glomerales; f__Glomeraceae; g__Glomus; s__Glomus_indicum</i>                               |
| OTU220     | <i>k__Fungi; p__Glomeromycota; c__Glomeromycetes; o__Glomerales; f__Glomeraceae; g__Septoglomus; Unclassified</i>                               |
| OTU226     | <i>k__Fungi; p__Glomeromycota; c__Glomeromycetes; o__Glomerales; f__Glomeraceae; g__Septoglomus; Unclassified</i>                               |
| OTU261     | <i>k__Fungi; p__Glomeromycota; c__Glomeromycetes; o__Glomerales; f__Glomeraceae; Unclassified; Unclassified</i>                                 |
| OTU266     | <i>k__Fungi; p__Glomeromycota; c__Glomeromycetes; o__Glomerales; f__Glomeraceae; g__Kamienskia; s__Kamienskia_perpusilla</i>                    |
| OTU307     | <i>k__Fungi; p__Glomeromycota; c__Glomeromycetes; o__Glomerales; f__Glomeraceae; g__Kamienskia; s__Kamienskia_perpusilla</i>                    |
| OTU348     | <i>k__Fungi; p__Glomeromycota; c__Glomeromycetes; o__Glomerales; f__Glomeraceae; g__Kamienskia; s__Kamienskia_perpusilla</i>                    |
| OTU393     | <i>k__Fungi; p__Glomeromycota; c__Glomeromycetes; o__Glomerales; f__Glomeraceae; g__Rhizophagus; s__Rhizophagus_irregularis</i>                 |
| OTU395     | <i>k__Fungi; p__Glomeromycota; c__Glomeromycetes; o__Glomerales; f__Glomeraceae; Unclassified; Unclassified</i>                                 |
| OTU400     | <i>k__Fungi; p__Glomeromycota; c__Glomeromycetes; o__Gigasporales; f__Gigasporaceae; g__Scutellospora; s__Scutellospora_calospora</i>           |
| OTU481     | <i>k__Fungi; p__Glomeromycota; c__Glomeromycetes; o__Glomerales; f__Glomeraceae; g__Glomus; s__Glomus_indicum</i>                               |
| OTU528     | <i>k__Fungi; p__Glomeromycota; c__Glomeromycetes; o__Glomerales; f__Glomeraceae; g__Glomus; s__Glomus_indicum</i>                               |
| OTU534     | <i>k__Fungi; p__Glomeromycota; c__Glomeromycetes; o__Diversisporales; f__Diversisporaceae; Unclassified; Unclassified</i>                       |
| OTU541     | <i>k__Fungi; p__Glomeromycota; c__Glomeromycetes; o__Glomerales; f__Glomeraceae; g__Glomus; s__Glomus_aggregatum</i>                            |
| OTU581     | <i>k__Fungi; p__Glomeromycota; c__Glomeromycetes; o__Glomerales; f__Glomeraceae; g__Glomus; s__Glomus_aggregatum</i>                            |
| OTU583     | <i>k__Fungi; p__Glomeromycota; c__Glomeromycetes; o__Diversisporales; f__Diversisporaceae; Unclassified; Unclassified</i>                       |
| OTU641     | <i>k__Fungi; p__Glomeromycota; c__Glomeromycetes; o__Glomerales; f__Glomeraceae; g__Funneliformis; Unclassified</i>                             |
| OTU657     | <i>k__Fungi; p__Glomeromycota; c__Glomeromycetes; o__Glomerales; f__Glomeraceae; Unclassified; Unclassified</i>                                 |

---

|         |                                                                                                                           |
|---------|---------------------------------------------------------------------------------------------------------------------------|
| OTU661  | <i>k__Fungi; p__Glomeromycota; c__Glomeromycetes; Unclassified; Unclassified; Unclassified; Unclassified</i>              |
| OTU690  | <i>k__Fungi; p__Glomeromycota; c__Glomeromycetes; o__Glomerales; f__Glomeraceae; Unclassified; Unclassified</i>           |
| OTU751  | <i>k__Fungi; p__Glomeromycota; c__Glomeromycetes; o__Diversisporales; f__Diversisporaceae; Unclassified; Unclassified</i> |
| OTU759  | <i>k__Fungi; p__Glomeromycota; c__Glomeromycetes; o__Glomerales; f__Glomeraceae; Unclassified; Unclassified</i>           |
| OTU794  | <i>k__Fungi; p__Glomeromycota; c__Glomeromycetes; o__Glomerales; f__Glomeraceae; Unclassified; Unclassified</i>           |
| OTU828  | <i>k__Fungi; p__Glomeromycota; c__Glomeromycetes; o__Diversisporales; f__Diversisporaceae; Unclassified; Unclassified</i> |
| OTU831  | <i>k__Fungi; p__Glomeromycota; c__Glomeromycetes; o__Glomerales; f__Glomeraceae; Unclassified; Unclassified</i>           |
| OTU834  | <i>k__Fungi; p__Glomeromycota; c__Glomeromycetes; o__Glomerales; f__Glomeraceae; Unclassified; Unclassified</i>           |
| OTU844  | <i>k__Fungi; p__Glomeromycota; c__Glomeromycetes; o__Glomerales; f__Glomeraceae; g__Glomus; Unclassified</i>              |
| OTU849  | <i>k__Fungi; p__Glomeromycota; c__Glomeromycetes; o__Glomerales; f__Glomeraceae; g__Rhizophagus; Unclassified</i>         |
| OTU856  | <i>k__Fungi; p__Glomeromycota; c__Glomeromycetes; o__Glomerales; f__Glomeraceae; Unclassified; Unclassified</i>           |
| OTU860  | <i>k__Fungi; p__Glomeromycota; c__Glomeromycetes; o__Glomerales; f__Glomeraceae; g__Glomus; s__Glomus_aggregatum</i>      |
| OTU878  | <i>k__Fungi; p__Glomeromycota; c__Glomeromycetes; o__Glomerales; f__Glomeraceae; g__Rhizophagus; Unclassified</i>         |
| OTU879  | <i>k__Fungi; p__Glomeromycota; c__Glomeromycetes; o__Glomerales; f__Glomeraceae; g__Dominikia; s__Dominikia_bernensis</i> |
| OTU1216 | <i>k__Fungi; p__Glomeromycota; c__Glomeromycetes; o__Glomerales; f__Glomeraceae; g__Glomus; s__Glomus_indicum</i>         |
| OTU129  | <i>k__Fungi; p__Glomeromycota; c__Glomeromycetes; o__Glomerales; f__Glomeraceae; Unclassified; Unclassified</i>           |

---

**Supplementary Table 5** OTU data of PPF obtained by utilizing fungal function prediction. OTU: Oxygen Tolerance Unit. PPF: plant pathogenic fungi.

| PPF     | taxonomy                                                                                                                              |
|---------|---------------------------------------------------------------------------------------------------------------------------------------|
| OTU1008 | <i>k__Fungi; p__Ascomycota; c__Sordariomycetes; o__Xylariales; f__Diatrypaceae; g__Monosporascus; Unclassified</i>                    |
| OTU117  | <i>k__Fungi; p__Ascomycota; c__Sordariomycetes; o__Hypocreales; f__Hypocreales_fam_Incertae_sedis; g__Trichothecium; Unclassified</i> |
| OTU707  | <i>k__Fungi; p__Ascomycota; c__Dothideomycetes; o__Pleosporales; f__Coniothyriaceae; g__Coniothyrium; s__Coniothyrium_sidae</i>       |
| OTU877  | <i>k__Fungi; p__Ascomycota; c__Eurotiomycetes; o__Eurotiales; f__Aspergillaceae; g__Penicillium; s__Penicillium_oxalicum</i>          |
| OTU845  | <i>k__Fungi; p__Basidiomycota; c__Ustilaginomycetes; o__Ustilaginales; f__Ustilaginaceae; g__Ustilago; s__Ustilago_maydis</i>         |





**Supplementary Table 6** The Rarefaction Curves of each sample. Note: X-axis represents the number of sequences picked randomly, Value: the OTU number based on the clustering of these sequences. D1, D2, D3, D4 and D5 indicating the respective proportions of *L. chinensis* and *S. chamaejasme* were 12:0, 8:4, 6:6, 4:8, and 0:12 respectively. L: the rhizosphere soil of *L. chinensis*; S: the rhizosphere soil of *S. chamaejasme*.

| sample | the number of sequences in final | Value   |
|--------|----------------------------------|---------|
| D1L1   | 75750                            | 540.978 |
| D1L2   | 75500                            | 572.966 |
| D1L3   | 75750                            | 623.982 |
| D1L4   | 74500                            | 580.99  |
| D1L5   | 74250                            | 536.934 |
| D2L1   | 75500                            | 539.986 |
| D2L2   | 76500                            | 570.982 |
| D2L3   | 75750                            | 625.956 |
| D2L4   | 74750                            | 557.91  |
| D2L5   | 77000                            | 546.956 |
| D3L1   | 75250                            | 516.988 |
| D3L2   | 76000                            | 587.94  |
| D3L3   | 75250                            | 626.98  |
| D3L4   | 75500                            | 602.962 |
| D3L5   | 75000                            | 550.882 |
| D4L1   | 73500                            | 506.976 |
| D4L2   | 74750                            | 485.978 |
| D4L3   | 76000                            | 397.998 |
| D4L4   | 74250                            | 448     |
| D4L5   | 74250                            | 361.96  |
| D2S1   | 73500                            | 519.978 |

---

|      |       |         |
|------|-------|---------|
| D2S2 | 75750 | 326.964 |
| D2S3 | 75250 | 517.976 |
| D2S4 | 76000 | 473.994 |
| D2S5 | 75500 | 318.986 |
| D3S1 | 77750 | 490.898 |
| D3S2 | 75500 | 552.984 |
| D3S3 | 76250 | 529.96  |
| D3S4 | 74500 | 437.992 |
| D3S5 | 75250 | 496     |
| D4S1 | 73500 | 354.988 |
| D4S2 | 74500 | 421.966 |
| D4S3 | 72750 | 427.96  |
| D4S4 | 75750 | 383.994 |
| D4S5 | 76000 | 327.998 |
| D5S1 | 74500 | 361.956 |
| D5S2 | 71500 | 353.98  |
| D5S3 | 71250 | 431.996 |
| D5S4 | 73250 | 499.928 |
| D5S5 | 71000 | 431.984 |

---

**Supplementary Table 7** FUNGuild predicts the relative number of the sequences of OTU functional groups. (means) D1, D2, D3, D4 and D5 indicating the respective proportions of *L. chinensis* and *S. chamaejasme* were 12:0, 8:4, 6:6, 4:8, and 0:12 respectively. L: the rhizosphere soil of *L. chinensis*; S: the rhizosphere soil of *S. chamaejasme*. (Keep two digits in the result)

| Sample | Arbuscular<br>Mycorrhizal<br>Fungi | Dung<br>Saprotroph | Dung<br>Saprotroph-<br>Undefined<br>Saprotroph | Ectomycorrhizal | Endophyte | Endophyte-<br>Lichen<br>Parasite-<br>Wood<br>Saprotroph | Plant<br>Pathogenic<br>fungi | Undefined<br>Saprotroph | Undefined<br>Saprotroph-<br>Wood<br>Saprotroph |
|--------|------------------------------------|--------------------|------------------------------------------------|-----------------|-----------|---------------------------------------------------------|------------------------------|-------------------------|------------------------------------------------|
| D1L    | 1226.55                            | 1289.12            | 101.55                                         | 187.30          | 8.90      | 1.43                                                    | 25.12                        | 386.71                  | 71.66                                          |
| D2L    | 1570.85                            | 1186.71            | 66.30                                          | 186.16          | 33.33     | 0                                                       | 9.95                         | 424.83                  | 181.03                                         |
| D3L    | 1596.60                            | 1206.16            | 67.39                                          | 189.21          | 33.88     | 0                                                       | 10.12                        | 431.79                  | 184.00                                         |
| D4L    | 1870.99                            | 283.47             | 135.00                                         | 233.98          | 136.69    | 4.62                                                    | 3.20                         | 436.57                  | 155.22                                         |
| D2S    | 1374.70                            | 517.86             | 8.95                                           | 213.18          | 4.796     | 96.53                                                   | 0.09                         | 439.94                  | 63.11                                          |
| D3S    | 950.25                             | 439.44             | 46.31                                          | 98.84           | 4.95      | 0                                                       | 14.19                        | 792.92                  | 128.06                                         |
| D4S    | 711.33                             | 266.07             | 56.49                                          | 571.35          | 13.35     | 0                                                       | 5.49                         | 307.44                  | 73.25                                          |
| D5S    | 471.71                             | 255.73             | 16.12                                          | 429.78          | 31.07     | 0                                                       | 166.60                       | 200.84                  | 6.52                                           |

**Supplementary Table 8** FUNGuild predicts the relative abundance percentage of the sequences of OTU functional groups. D1, D2, D3, D4 and D5 indicating the respective proportions of *L. chinensis* and *S. chamaejasme* were 12:0, 8:4, 6:6, 4:8, and 0:12 respectively. L: the rhizosphere soil of *L. chinensis*; S: the rhizosphere soil of *S. chamaejasme*.

| Sample | Arbuscular<br>Mycorrhizal<br>(%) | Dung<br>Saprotroph<br>(%) | Dung<br>Saprotroph-<br>Undefined<br>Saprotroph<br>(%) | Ectomycorrhizal<br>(%) | Endophyte<br>(%) | Endophyte-<br>Lichen<br>Parasite-<br>Wood<br>Saprotroph<br>(%) | Plant<br>Pathogen<br>(%) | Undefined<br>Saprotroph<br>(%) | Undefined<br>Saprotroph-<br>Wood<br>Saprotroph<br>(%) |
|--------|----------------------------------|---------------------------|-------------------------------------------------------|------------------------|------------------|----------------------------------------------------------------|--------------------------|--------------------------------|-------------------------------------------------------|
| D1L    | 37.1864435                       | 39.0834512                | 3.0790342                                             | 5.6788036              | 0.2700436        | 0.0435203                                                      | 0.7616841                | 11.7244404                     | 2.1725791                                             |
| D2L    | 42.9288153                       | 32.4308782                | 1.8121271                                             | 5.0875277              | 0.9110864        | 0                                                              | 0.2721088                | 11.6099427                     | 4.9475138                                             |
| D3L    | 42.7921407                       | 17.232498                 | 2.5977646                                             | 2.5376591              | 0.2331501        | 0.0495148                                                      | 0.1659446                | 30.8639798                     | 3.5273483                                             |
| D4L    | 57.3961312                       | 8.6962269                 | 4.1416179                                             | 7.1777606              | 4.1934405        | 0.1417848                                                      | 0.0984683                | 13.3926986                     | 4.7618713                                             |
| D2S    | 50.5556645                       | 19.0447404                | 0.3291419                                             | 7.8401189              | 0.1763945        | 3.550042                                                       | 0.00346121               | 16.1792358                     | 2.3211995                                             |
| D3S    | 38.394095                        | 17.7553473                | 1.8714385                                             | 3.993779               | 0.2001243        | 0                                                              | 0.5735412                | 32.0375317                     | 5.1741431                                             |
| D4S    | 35.4815657                       | 13.2718243                | 2.8179845                                             | 28.4991391             | 0.6659772        | 0                                                              | 0.2743                   | 15.3354622                     | 3.653745                                              |
| D5S    | 29.8859253                       | 16.2021324                | 1.0216035                                             | 27.2289                | 1.9685081        | 0                                                              | 10.5553                  | 12.7246552                     | 0.4129713                                             |

## Reference

- Wang, Y., Sheng, H. F., He, Y., Wu, J. Y., Jiang, Y. X., Tam, N. F. Y., et al. (2012). Comparison of the levels of bacterial diversity in freshwater, intertidal wetland, and marine sediments by using millions of illumina tags. *Appl Environ Microb.* 78(23):8264-8271. doi: 10.1128/AEM.01821-12
- Edgar, R. C (2013). UPARSE: highly accurate OTU sequences from microbial amplicon reads *Nat methods.* 10(10): 996.
- Nguyen, N. H., Song, Z., Bates, S. T., Branco, S., Tedersoo, L., Menke, J., Schilling, J. S., Kennedy, P. G (2016). FUNGuild: An open annotation tool for parsing fungal community datasets by ecological guild. *Fungal Ecol.* 20: 241-248. doi: <https://doi.org/10.1016/j.funeco.2015.06.006>
